# Supplementary material for: Neural Interruption by Unilateral Labyrinthectomy Biases the Directional Preference of Otolith-Related Vestibular Neurons
Source: Brain Sci. 2021 Jul 26;11(8):987. doi: 10.3390/brainsci11080987 (PMC8393366; doi:10.3390/brainsci11080987)
Supplement: Supplementary file 1 [file brainsci-11-00987-s001.zip › brainsci-1261589-supplementary.pdf]

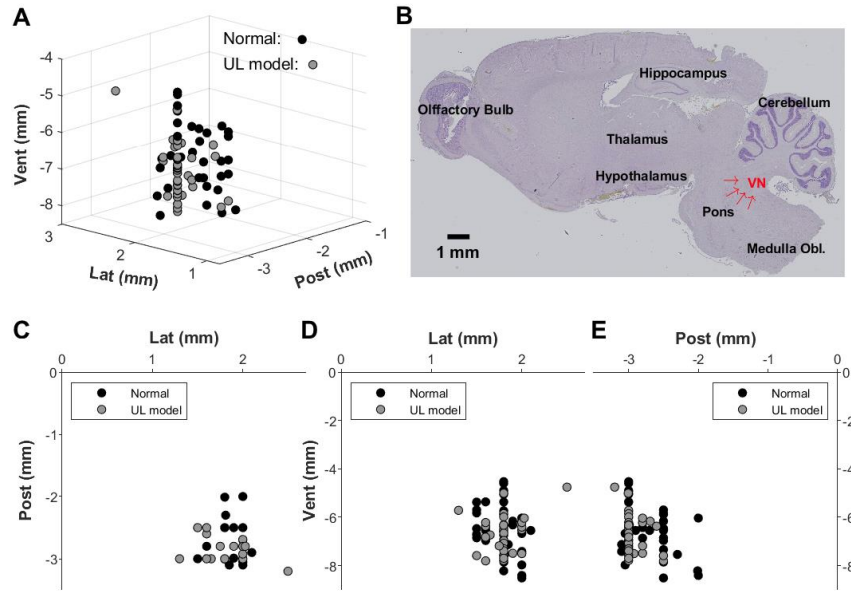

**Figure S1.** Neuronal recording area in the brain. (A) 3D area for neural recordings. (B) Sagittal section of the whole brain to identify Vestibular nucleus (VN) in red with arrows. (C) 2D area for neural recordings: lateral vs posterior direction from the center (D) 2D area for neural recordings: lateral vs ventral (E) 2D area for neural recordings: posterior vs ventral.

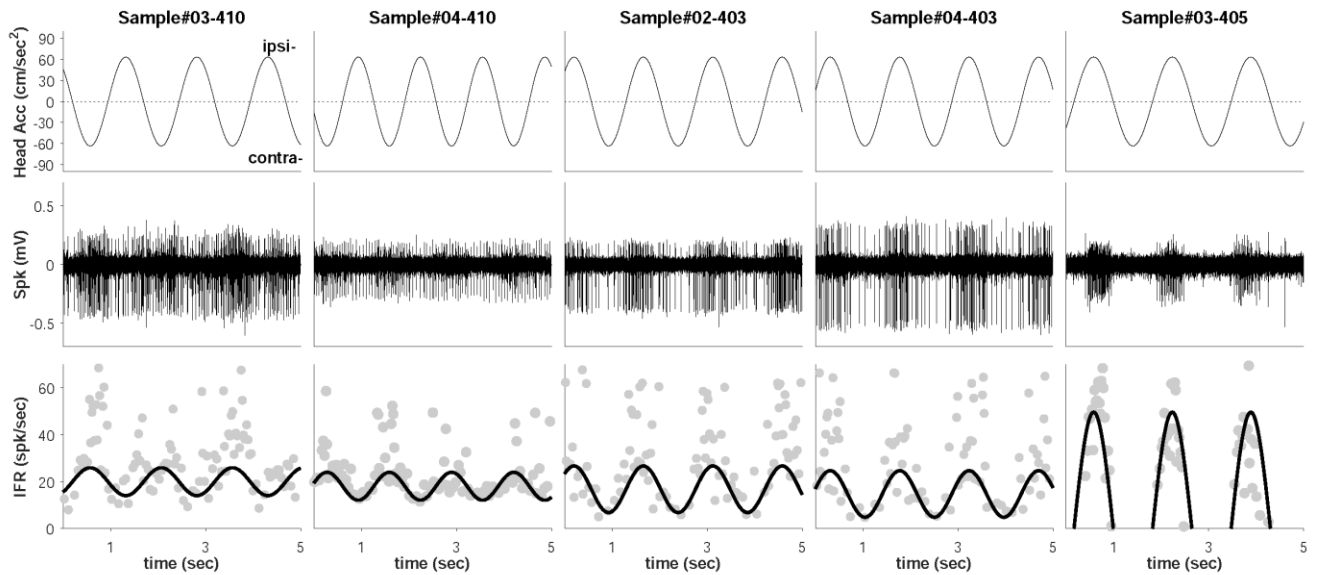

**Figure S2.** Extra examples of otolith-related neuronal responses during head acceleration. Two samples (#03-410 and #04-410) were identified as a contra-preferred response while others were ipsi-preferred. The first row showed head acceleration to stimulate the neuronal responses, and the second presented the neuronal spikes in mili-volts. The last one showed the relevant instantaneous firing rate and its curve-fitting.
